# Supplementary material
Source: MDPI journal article supplement (https://www.mdpi.com/2227-7390/10/19/3453)
Supplement: s1 [file s1 › Table S1.pdf]

**Supplementary Table S1.** Commonly used thresholds to define significance of evidence through Bayes factor (BF).

| Bayes Factor | Evidence Category                       | Bayes Factor | Evidence Category                     | Bayes Factor | Evidence Category                       |
|--------------|-----------------------------------------|--------------|---------------------------------------|--------------|-----------------------------------------|
| >100         | Extreme Evidence for H <sub>1</sub>     | 1-3          | Anecdotal Evidence for H <sub>1</sub> | 1/30-1/10    | Strong Evidence for H <sub>0</sub>      |
| 30-100       | Very Strong Evidence for H <sub>1</sub> | 1            | No Evidence                           | 1/100-1/30   | Very Strong Evidence for H <sub>0</sub> |
| 10-30        | Strong Evidence for H <sub>1</sub>      | 1/3-1        | Anecdotal Evidence for H <sub>0</sub> | 1/100        | Extreme Evidence for H <sub>0</sub>     |
| 3-10         | Moderate Evidence for H <sub>1</sub>    | 1/10-1/3     | Moderate Evidence for H <sub>0</sub>  |              |                                         |

H<sub>0</sub>: Null Hypothesis/Factors in the model do not have an effect over dependent variables/model comprising factors and the intercept and other only comprising the intercept present the same likelihood to predict for dependent variables; H<sub>1</sub>: Alternative Hypothesis/Factors in the Model have an effect on dependent variables/model comprising factors and the intercept presents a higher likelihood to predict for dependent variables than one just comprising the intercept.

Accessed from by Jeffreys [79] and Lee and Wagenmakers [80].
