# Supplementary material
Source: MDPI journal article supplement (https://www.mdpi.com/2227-7390/10/19/3453)
Supplement: s1 [file s1 › Table S3.xlsx]

## Sheet: Information
Article title	Bayesian Linear Regression and Natural Logarithmic Correction for Digital Image-Based Extraction of Linear and Tridimensional Zoometrics in Dromedary Camels
Journal name	Mathematics
Authors' name	Carlos Iglesias Pastrana, Francisco Javier Navas González, Elena Ciani, María Esperanza Camacho Vallejo and Juan Vicente Delgado Bermejo
Corresponding author's affiliation	aDepartment of Genetics, Faculty of Veterinary Sciences, University of Córdoba, 14014 Córdoba, Spain
	bAndalusian Institute of Agricultural and Fisheries Research and Training (IFAPA), Centro Alameda del Obispo, Alameda del Obispo, 14004 Córdoba, Spain
Corresponding author's email	franciscoj.navas@juntadeandalucia.es
Supplementary Table S3.	Descriptive statistics and dispersion measurements for digital imagin and on field zoometric variables in Canarian camels.

## Sheet: Descriptive Statistics
Measurement	Methodology	Mean	Std. Error of Mean	Median	Std. Deviation	Variance	Minimum	Maximum	Percentile 25	Percentile 50	Percentile 75
Head length	Digital	53.7031	0.492079	53	5.61057	31.478	36.5	67	50	53	58
	On field	54.0275	0.524311	53.4	5.97806	35.737	36.5	66.6	49.725	53.4	58.525
Head width	Digital	26.1115	0.242351	26	2.76323	7.635	19.1	35	24.3	26	28
	On field	26.4785	0.326987	26.4	3.72823	13.9	2.4	36.1	24.6	26.4	28.825
Ear length	Digital	10.62	0.127088	10.8	1.44902	2.1	4.5	13.9	9.8	10.8	11.5
	On field	11.1336	0.142484	11.3	1.62457	2.639	4.58	14.3	10.1	11.3	12.3
Ear width	Digital	7.55085	0.0988495	7.45	1.12706	1.27	3.7	10.5	7	7.45	8.3
	On field	7.92854	0.111053	8.1	1.2662	1.603	3.9	10.4	7.375	8.1	8.8
Neck length: dorsal line	Digital	122.496	1.44657	123	16.4935	272.035	65.4	178	114	123	134.25
	On field	122.327	1.66527	122.95	18.987	360.504	18.5	178	113.5	122.95	134.275
Neck length: ventral line	Digital	105.557	0.8615	105.8	9.823	96.491	54.6	128	100	105.8	111
	On field	106.099	0.878876	106.85	10.0207	100.415	54.6	128.7	101.2	106.85	112.1
Neck girth: cranial third	Digital	75.4148	0.827405	75.825	9.43387	88.998	49.58	103.26	70.5475	75.825	81.9325
	On field	75.9177	0.770781	76.75	8.78826	77.233	53	98.1	69.85	76.75	81.45
Neck girth: middle third	Digital	69.4138	0.865232	68.11	9.86516	97.321	46.92	116.43	63.115	68.11	75.1975
	On field	78.8254	0.763258	78.95	8.70248	75.733	54.4	100.3	72.375	78.95	84.125
Neck girth: caudal third	Digital	126.174	0.832036	125.942	9.48666	89.997	94.4405	152.001	119.217	125.942	133.097
	On field	112.853	1.17147	111.592	13.3568	178.404	86.4403	152.264	103.038	111.592	121.162
Chest width	Digital	50.938	0.5246	50.05	5.9812	35.774	36	65.2	47	50.05	56
	On field	51.6748	0.657115	51.4	7.49227	56.134	35.4	98.5	47	51.4	56.05
Heart girth	Digital	139.626	0.868249	140.103	9.89957	98.001	106.176	165.436	133.504	140.103	146.863
	On field	134.557	1.20604	136.04	13.751	189.091	69.84	160.04	128.04	136.04	143.04
Height at withers (stature)	Digital	177.95	0.669	177.5	7.629	58.206	158	201	173	177.5	183
	On field	190.839	12.5404	177.4	142.982	20443.8	158	1806	173.5	177.4	184.3
Body length	Digital	161.39	1.20915	161.6	13.7865	190.066	123.4	193	150.4	161.6	170.825
	On field	159.217	1.53399	162.3	17.4902	305.906	95	192.5	147.875	162.3	171.4
Hump-to-tail distance	Digital	49.4746	0.6352	50	7.2424	52.452	31.2	80.3	45	50	54.125
	On field	50.3438	0.660722	50.95	7.53339	56.752	30.9	81.5	45.825	50.95	54.85
Hump length	Digital	81.5115	1.17193	80	13.362	178.544	31	112.1	74	80	90.15
	On field	81.1055	1.3372	82.4	15.2464	232.452	18.6	113.5	73.2075	82.4	91.375
Hump width	Digital	85.4053	4.96225	80.05	56.5784	3201.11	40.9	711	73.75	80.05	88.4
	On field	84.6328	5.06511	82.55	57.7511	3335.19	12.9	713	73.5	82.55	88.625
Hump heigth	Digital	61.822	1.156	63	13.1805	173.725	27.3	92.7	54	63	70
	On field	62.5171	1.16801	63.6	13.3174	177.353	26.3	91.6	54.45	63.6	71.575
Hump girth	Digital	128.037	1.73904	127.76	19.8281	393.155	76.42	197.73	115.22	127.76	139.583
	On field	155.398	2.16738	159.5	24.7119	610.68	82	209.6	140	159.5	171.85
Rump length	Digital	42.9942	0.409552	42.7	4.66962	21.805	30.2	56	39.7	42.7	46.025
	On field	43.1382	0.4522	43	5.15587	26.583	30.5	57.4	39.95	43	46.425
Rump width	Digital	37.9585	0.488071	36.65	5.56487	30.968	26.5	52.21	33.725	36.65	41.9
	On field	38.3998	0.48515	37.2	5.53156	30.598	27.3	53.1	33.9	37.2	42.3
Tail length	Digital	52.5372	0.648332	54	7.39212	54.643	29.6	65.5	48.75	54	58
	On field	53.1569	0.697078	54.95	7.94791	63.169	27.6	65.5	48.275	54.95	58.925
Width at the base of the tail	Digital	12.4571	0.180525	12.25	2.05831	4.237	8.2	20.1	11.2	12.25	13.2
	On field	12.6892	0.18883	12.58	2.15299	4.635	8.1	21.3	11.275	12.58	13.425
Thigh perimeter	Digital	70.1742	0.913149	68.81	10.4115	108.399	47.14	103.35	62.545	68.81	76.28
	On field	80.6711	0.437143	80.2012	4.9842	24.842	63.8755	93.399	77.8686	80.2012	83.8912
Hock perimeter	Digital	39.4091	0.464206	39.18	5.29277	28.013	28.01	55.29	35.495	39.18	43.1875
	On field	43.5023	0.307148	43.4279	3.50203	12.264	32.3546	52.487	41.4192	43.4279	46.1517
Fore cannon bone perimeter	Digital	14.6539	0.244139	14.1	2.78361	7.749	8.12	22.16	12.6675	14.1	16.885
	On field	20.2034	0.0982071	20.1758	1.11973	1.254	17.6036	23.1806	19.4692	20.1758	21.0955
Rear cannon bone perimeter	Digital	17.1237	0.273055	17.36	3.11331	9.693	10.37	23.58	14.5875	17.36	18.88
	On field	22.135	0.111153	22.0889	1.26734	1.606	18.3305	24.8562	21.2314	22.0889	23.0488
Sole length	Digital	18.7954	0.173909	18.9	1.98287	3.932	13.9	24.3	17.6	18.9	19.825
	On field	19.0476	0.184439	19.45	2.10293	4.422	13	24.6	18.3	19.45	20.425
Length of toe dorsal line	Digital	14.4092	0.268116	14.3	3.05699	9.345	9.4	43.3	13.275	14.3	15.5
	On field	14.164	0.305877	14.225	3.48754	12.163	6	44.5	12.475	14.225	15.6
Heel heigth	Digital	7.76246	0.363582	7.35	4.14548	17.185	4.7	53	6.7075	7.35	7.925
	On field	7.91062	0.365161	7.5	4.16348	17.335	4.56	52.3	6.4	7.5	8.5
Foot perimeter	Digital	36.9735	0.377962	36.86	4.30942	18.571	25.39	54.99	34.4075	36.86	39.35
	On field	45.0255	0.0994523	44.9129	1.13393	1.286	41.3184	49.4939	44.3787	44.9129	45.5617
